# Supplementary material for: IS6110 Copy Number in Multi-Host Mycobacterium bovis Strains Circulating in Bovine Tuberculosis Endemic French Regions
Source: Front Microbiol. 2022 Jun 23;13:891902. doi: 10.3389/fmicb.2022.891902 (PMC9260277; doi:10.3389/fmicb.2022.891902)
Supplement: Supplementary file 2 [file Table_1.XLSX]

## Sheet: Legend
Supplementary Table 1: Information on Mycobacterium bovis employed in this study. First sheet: 81 strains representing the French strains diversity (including Mb3601 reference strains) and their IS6110 copy number. The squares counted are present in Figure 1. Second sheet: information of 93 SB0120-CO Mycobacterium bovis strains (including Mb3601 reference strains) from Côte d’Or. Localisation of …

## Sheet: M. bovis French diversity
Number	Number of IS6110 copies	Number of analysis	Region of origin	Department	Year of isolation	Spoligotype alias	Spoligotype ID	MLVA markers MIRU VNTR	Host	Deposit date	Depth sequencing	Genbank biosample
H4	1	D-11-02358	Poitou-Charentes	16	2011	BCG	SB0120	5 5 5 3 11 4 5 6	Cattle	2018	101	SAMN09812470
E7	1	1989-11303	Auvergne	3	1989	BCG	SB0120	4 5 5 3 11 4 5 6	Cattle	2018	68	SAMN09812390
G12	4	07-00988	Rhône-alpes	38	2007	BCG	SB0120	4 5 5 3 11 3 5 8	Cattle	2018	129	SAMN09812439
F4	1	1998-03202	Rhône-alpes	73	1998	BCG	SB0120	5 5 3 3 11 4 5 4	Cattle	2018	149	SAMN09812409
F5	1	1998-07429	Rhône-alpes	74	1998	BCG	SB0120	5 5 5 3 11 4 5 4	Cattle	2018	127	SAMN09812410
D9	1	11Z002216	Rhône-alpes	74	2011	BCG	SB0120	5 5 5 3 11 3 5 4	Cattle	2018	57	SAMN09812462
E8	1	1991-03597	Burgundy	71	1991	BCG	SB0120	5 5 5 3 11 4 4 6	Cattle	2018	103	SAMN09812393
G2	1	1999-10275	Rhône-alpes	73	1999	F11	SB0828	5 5 5 3 11 2 5 6	Cattle	2018	167	SAMN09812421
E11	1	1994-00454	Rhône-alpes	1	1994	F11	SB0828	5 5 5 3 11 3 5 6	Cattle	2018	164	SAMN09812398
G8	1	1994-07488-01	Rhône-alpes	73	1994	BCG	SB0120	4 5 5 3 11 3 5 6	Cattle	2018	177	SAMN09812399
D1	1	11Z000004	Languedoc-roussillon	34	2011	F105	SB0948	2 5 5 1 11 3 5 6	Cattle	2018	72	SAMN09812454
F8	1	1999-04628	Burgundy	71	1999	F68	SB0040	4 4 + 5 3 3 10 3 5 6	Cattle	2018	73	SAMN09812414
E10	1	1992-01143	Burgundy	71	1992	BCG	SB0120	3 5 5 3 11 3 5 6	Cattle	2018	129	SAMN09812396
G5	1	00-03750	Rhône-alpes	73	2000	BCG	SB0120	4 5 5 3 10 3 5 6	Cattle	2018	112	SAMN09812426
A11	1	1997-08101	Rhône-alpes	74	1997	F3	SB0822	4 5 5 3 10 3 5 5	Cattle	2018	130	SAMN09812406
F10	1	1999-05830	Burgundy	71	1999	F84	SB0927	5 4 5 3 11 4 4 9	Cattle	2018	65	SAMN09812417
E1	1	11Z004022	Aquitaine	40	2011	BCG	SB0120	5 3 5 3 11 2 5 6	Cattle	2018	51	SAMN09812465
A2	1	1991-07112	Rhône-alpes	38	1991	GB35	SB0134	1 2 5 3 10 4 8 6	Cattle	2018	127	SAMN09812394
C12	11	11Z000119	Burgundy	21	2011	SB0120-CO	SB0120	5 5 4 3 11 4 5 6	Cattle	2018	93	SAMN09812455
Mb3601	11	14Z005608	Burgundy	21	2014	SB0120-CO	SB0120	5 5 3 3 10 4 5 6	Cattle	2020
B9	7	08-00587-00	Corsica	20	2008	BCG	SB0120	4 5 5 3 11 4 5 7	Cattle	2018	139	SAMN09812441
G9	10	04-03851	Rhône-alpes	42	2004	GB35	SB0134	5 4 5 3 11 4 4 6	Cattle	2018	61	SAMN09812431
F1	7	1996-10534	Haute-normandie	27	1996	F2	SB0162	5 5 5 3 11 4 5 7	Cattle	2018	67	SAMN09812403
A5	16	1995-09964	Nord-pas-de-calais	62	1995	BCG	SB0120	5 4 5 3 9 4 5 6	Cattle	2018	96	SAMN09812400
H2	11	D-11-00657	Aquitaine	24	2011	SB0120-HDV	SB0120	5 3 5 3 9 3 5 6	Deer	2018	88	SAMN09812468
C10	13	10Z009059	Aquitaine	24	2010	SB0120-HDV	SB0120	5 3 5 3 9 4 5 6	Wild boar	2016	88	SAMN05725038
F9	1	1999-05770	Poitou-Charentes	16	1999	BCG	SB0120	4 3 5 3 9 4 1 6	Cattle	2018	112	SAMN09812416
F2	1	1997-07124	Burgundy	89	1997	BCG	SB0120	5 4 5 3 11 4 5 6	Cattle	2018	80	SAMN09812405
A7	1	1999-04695	Nord-pas-de-calais	59	1999	BCG	SB0120	5 2 3 3 10 3 3 10	Cattle	2018	75	SAMN09812415
C2	1	09-00013-00	Midi-pyrenees	65	2009	BCG	SB0120	5 5 6 2 11 2 5 7	Cattle	2018	51	SAMN09812445
B5	1	06-01441-00	Poitou-Charentes	86	2006	F18	SB0852	2 5 5 2 9 3 5 5	Cattle	2018	89	SAMN09812436
G1	1	1999-09147	Midi-pyrenees	65	1999	F45	SB0830	2 6 5 3 10 4 5 6	Cattle	2018	61	SAMN09812420
E5	1	1983-04054	Midi-pyrenees	32	1983	F22	SB0819	3 5 5 3 10 4 5 7	Cattle	2018	171	SAMN09812388
G11	1	1997-08679	Midi-pyrenees	32	1997	F22	SB0819	3 6 5 3 10 4 5 6	Cattle	2018	159	SAMN09812407
C3	1	09-00015-00	Aquitaine	40	2009	F22	SB0819	3 6 5 2 9 3 4 6	Cattle	2018	166	SAMN09812446
C4	1	09-00795-00	Aquitaine	64	2009	F9	SB0853	2 6 5 3 10 4 3 8	Cattle	2018	175	SAMN09812447
F12	1	1999-08385-02	Brittany	35	1999	GB54	SB0121	6 4 3 3 10 2 6 7	Ovine	2018	86	SAMN09812419
A12	1	01-09794	Pays-de-la-loire	72	2001	F29	SB0837	5 4 3 3 10 2 5 7	Cattle	2018	67	SAMN09812429
E4	1	06-02317-00	Poitou-Charentes	86	2006	GB54	SB0121	6 4 3 3 11 2 5 7	Cattle	2018	116	SAMN09812437
A6	4	1996-11240	Nord-pas-de-calais	59	1996	GB54	SB0121	5 5 3 3 11 2 5 7	Cattle	2018	76	SAMN09812404
G7	4	00-06237	Poitou-Charentes	79	2000	F44	SB0839	6 4 3 3 11 2 5 9 N	Cattle	2018	110	SAMN09812428
B6	3	07-00832-00	Provence-Alpes-Côte d'Azur	13	2007	F44	SB0839	6 4 3 3 11 2 5 7	Cattle	2018	103	SAMN09812438
G3	5	00-01549	Auvergne	3	2000	GB54	SB0121	5 4 5 3 11 2 5 7	Cattle	2018	91	SAMN09812424
D4	4	11Z000144	Poitou-Charentes	79	2011	GB54	SB0121	5 4 5 4 11 2 5 9	Cattle	2018	122	SAMN09812457
C7	3	09-01431-00	Aquitaine	24	2009	B	SB0119	6 4 5 2 8 2 4 7	Cattle	2018	54	SAMN09812449
H5	1	D-11-03130	Aquitaine	40	2011	GB54	SB0121	5 2 5 3 8 2 5 6	Cattle	2017	145	SAMN06250738
B10	1	08-01130-00	Aquitaine	47	2008	GB54	SB0121	5 2 5 3 8 2 4 11	Cattle	2018	96	SAMN09812442
B1	1	02-07821-05	Poitou-Charentes	79	2002	F40	SB0152	5 4 5 3 11 2 5 10	Caprine	2018	74	SAMN09812430
F11	1	1999-07327-02	Rhône-alpes	73	1999	GB54	SB0121	5 4 5 3 11 2 5 6	Cattle	2018	149	SAMN09812418
E3	1	11Z005103	Aquitaine	40	2011	F70	SB0295	6 4 5 3 11 2 5 7	Cattle	2018	51	SAMN09812467
A3	1	1991-01505	Nord-pas-de-calais	62	1991	GB54	SB0121	5 3 3 3 11 4 4 3	Cattle	2018	98	SAMN09812392
G6	2	00-03942-02	Picardie	80	2000	BCG	SB0120	7 4 5 3 11 3 6 6	Cattle	2018	100	SAMN09812427
A10	1	00-01101	Nord-pas-de-calais	62	2000	F10	SB0829	7 5 5 2 11 3 1 6	Cattle	2018	74	SAMN09812423
G4	1	00-03397	Poitou-Charentes	17	2000	GB9	SB0140	7 5 5 3 11 4 4 9	Cattle	2018	118	SAMN09812425
E12	1	1995-09002-00	Poitou-Charentes	16	1995	GB9	SB0140	7 5 5 4 11 4 4 9	Cattle	2018	96	SAMN09812402
G10	1	04-04123	Midi-pyrenees	46	2004	GB9	SB0140	7 5 5 3 11 4 4 10	Cattle	2018	98	SAMN09812432
B7	2	07-02972-00	Midi-pyrenees	31	2007	GB9	SB0140	7 5 5 3 11 4 2 8	Cattle	2018	65	SAMN09812440
F6	1	1998-07576	Midi-pyrenees	32	1998	GB20	SB0145	6 5 5 3 10 5 3 9	Cattle	2018	61	SAMN09812411
C11	1	10Z008878	Aquitaine	47	2010	GB21	SB0130	4 3 5 3 9 3 4 11	Cattle	2018	165	SAMN09812453
E9	1	1991-1170-00	Picardie	60	1991	F6	SB0089	6 4 5 3 11 4 4 10	Cattle	2018	64	SAMN09812395
C9	1	10Z007328	Limousin	19	2010	F6	SB0089	6 4 5 3 11 4 4 9	Cattle	2018	60	SAMN09812452
D6	3	11Z001821	Midi-pyrenees	9	2011	GB35	SB0134	6 5 5 3 6 4 5 6	Cattle	2018	53	SAMN09812460
E6	1	1985-02847-02	Ile-de-France	77	1985	F43	SB0824	4 5 5 3 9 4 4 6	Cattle	2018	89	SAMN09812389
B2	1	06-00399-00	Pays-de-la-loire	53	2006	GB35	SB0134	4 5 5 3 9 4 6 8	Cattle	2018	61	SAMN09812433
A9	1	00-00055	Nord-pas-de-calais	62	2000	F20	SB0128	3 3 5 3 11 4 3 6	Cattle	2018	55	SAMN09812422
C1	1	08-01357-00	Basse-normandie	61	2008	GB35	SB0134	3 5 5 3 10 4 5 5	Cattle	2018	150	SAMN09812443
D7	1	11Z001847	Haute_normandie	76	2011	GB35	SB0134	7 4 5 3 10 4 5 10	Wild boar	2017	147	SAMN06250727
D11	1	11Z003183	Burgundy	21	2011	GB35	SB0134	6 4 5 3 6 4 3 6	Cattle	2018	82	SAMN09812463
A4	1	1992-02259	Nord-pas-de-calais	62	1992	F68	SB0040	5 2 5 3 5 4 3 6	Cattle	2018	99	SAMN09812397
A1	1	1989-13747	Nord-pas-de-calais	62	1989	BCG	SB0120	4 2 6 3 9 4 3 6	Cattle	2018	55	SAMN09812391
C8	1	10Z000964	Burgundy	71	2010	F110	SB0885	9 1 5 1 9 3 5 6	Cattle	2018	100	SAMN09812451
C6	4	09-01491-00	languedoc-roussillon	48	2009	F53	SB0946	9 3 5 4 9 2 5s 5	Cattle	2018	176	SAMN09812450
C5	5	09-01281-00	Rhône-alpes	42	2009	F140	SB0843	7 5 4 3 9 2 5s 6	Cattle	2018	56	SAMN09812448
D5	2	11Z001439	Corsica	2A	2011	F1	SB0840	7 5 5 3 8 2 5s 3	Pig	2018	70	SAMN09812459
B12	3	1995-11345-00	Auvergne	63	1995	F4	SB0818	5 5 5 3 8 2 5s 7	Cattle	2018	66	SAMN09812401
D3	4	11Z000774	Aquitaine	64	2011	F5	SB0826	6 7 3 3 10 2 5s 8	Cattle	2018	67	SAMN09812458
D12	3	11Z003711	Aquitaine	64	2011	F72	SB0928	6 7 3 3 10 2 7s 9	Cattle	2018	59	SAMN09812464
D2	3	11Z000134	Provence-Alpes-Côte d'Azur	13	2011	F23	SB0827	6 5 5 3 11 2 5s 8	Cattle	2018	95	SAMN09812456
B3	3	06-01150-00	Languedoc-roussillon	34	2006	F61	SB0825	6 3 5 3 11 2 4s 7	Cattle	2018	147	SAMN09812435
E2	3	11Z004926	Midi-pyrenees	82	2011	F41	SB0823	6 5 5 3 11 2 5s 6	Cattle	2018	162	SAMN09812466
B4	3	06-00968-00	Nord-pas-de-calais	62	2006	F7	SB0821	4 5 5 3 11 2 5s 8	Cattle	2018	99	SAMN09812434

## Sheet: SB0120-CO
Name	Number of analysis	Year of isolation	Host	Deposit date	Depth sequencing	Genbank biosample
Mb3601	14Z005608	2014	Cattle	2020		SAMEA5803801
158	D-11-01256	2009	Badger	2021	222	SAMEA8987121
159	10-01071-06	2009	Badger	2021	130	SAMEA8987095
164	10-00545-02	2009	Cattle	2021	222	SAMEA8987215
171	10-00875-06	2009	Badger	2021	142	SAMEA8987093
172	09-01466-00	2009	Badger	2021	142	SAMEA8987079
179	09-01467-00	2009	Cattle	2021	97	SAMEA8987080
181	10-01289-02	2009	Cattle	2021	198	SAMEA8987097
67	09-00616-00	2010	Badger	2021	91	SAMEA8987074
126	09-01399-00	2010	Fox	2021	105	SAMEA8987077
142	09-01400-00	2010	Badger	2021	169	SAMEA8987078
160	09-01044-00	2010	Badger	2021	114	SAMEA8987075
242	09-01047-00	2010	Cattle	2021	153	SAMEA8987076
254	10-00528-00	2010	Cattle	2021	133	SAMEA8987085
265	10-00580-00	2010	Cattle	2021	89	SAMEA8987086
270	10-00657-00	2010	Cattle	2021	85	SAMEA8987089
272	10-00837-00	2010	Cattle	2021	115	SAMEA8987090
273	10-00839-00	2010	Cattle	2021	78	SAMEA8987091
289	10-00841-00	2010	Cattle	2021	106	SAMEA8987092
297	10-00977-00	2010	Cattle	2021	89	SAMEA8987094
322	10-01080-00	2010	Cattle	2021	82	SAMEA8987096
328	10-01315-00	2010	Cattle	2021	98	SAMEA8987100
333	10-01324-00	2010	Cattle	2021	79	SAMEA8987101
335	D-10-01453	2010	Cattle	2021	95	SAMEA8987102
338	D-10-01483	2010	Badger	2021	122	SAMEA8987103
341	D-10-01722	2010	Cattle	2021	92	SAMEA8987105
343	D-10-01823	2010	Badger	2021	82	SAMEA8987106
2	D-10-01986	2011	Wild boar	2021	222	SAMEA8987107
353	D-11-00034	2011	Cattle	2021	107	SAMEA8987109
354	D-11-00037	2011	Cattle	2021	92	SAMEA8987110
374	D-11-00813	2011	Cattle	2021	76	SAMEA8987117
375	D-11-00814	2011	Cattle	2021	118	SAMEA8987118
386	D-11-01155	2011	Cattle	2021	143	SAMEA8987119
397	D-11-01427	2011	Cattle	2021	95	SAMEA8987122
399	D-11-01687	2011	Cattle	2021	79	SAMEA8987123
412	D-11-02030	2011	Badger	2021	80	SAMEA8987125
419	D-11-03119	2011	Badger	2021	94	SAMEA8987128
425	D-11-03384	2011	Cattle	2021	110	SAMEA8987129
445	D-12-01244	2012	Cattle	2021	108	SAMEA8987132
459	D-12-01616	2012	Cattle	2021	89	SAMEA8987134
465	D-12-01704	2012	Cattle	2021	89	SAMEA8987136
476	D-12-02101	2012	Cattle	2021	93	SAMEA8987137
481	D-12-02237	2012	Cattle	2021	79	SAMEA8987139
498	D-12-03377	2012	Badger	2021	96	SAMEA8987142
504	D-12-03808	2012	Badger	2021	110	SAMEA8987144
515	D-13-00420	2013	Cattle	2021	185	SAMEA8987146
516	D-13-00508	2013	Cattle	2021	96	SAMEA8987147
517	D-13-00509	2013	Cattle	2021	103	SAMEA8987148
526	D-13-00778	2013	Cattle	2021	83	SAMEA8987149
530	D-13-00832	2013	Cattle	2021	84	SAMEA8987151
532	D-13-00848	2013	Cattle	2021	197	SAMEA8987152
533	D-13-01019	2013	Cattle	2021	96	SAMEA8987153
537	D-13-01066	2013	Cattle	2021	77	SAMEA8987155
550	D-13-01353	2013	Cattle	2021	125	SAMEA8987156
552	D-13-01552	2013	Cattle	2021	94	SAMEA8987158
570	D-13-01664	2013	Cattle	2021	167	SAMEA8987159
573	D-13-01802	2013	Badger	2021	129	SAMEA8987161
574	D-13-01802	2013	Badger	2021	85	SAMEA8987162
577	D-13-01802	2013	Badger	2021	79	SAMEA8987164
583	D-13-01802	2013	Badger	2021	104	SAMEA8987167
585	D-13-01989	2013	Badger	2021	143	SAMEA8987168
589	D-13-02045	2013	Cattle	2021	200	SAMEA8987170
596	D-13-02376	2013	Badger	2021	125	SAMEA8987171
598	D-13-02679	2013	Badger	2021	150	SAMEA8987172
599	D-13-02679	2013	Badger	2021	143	SAMEA8987173
601	D-13-02709	2013	Cattle	2021	112	SAMEA8987174
605	D-13-03583	2013	Badger	2021	153	SAMEA8987176
607	D-14-00120	2014	Cattle	2021	104	SAMEA8987177
608	D-14-00125	2014	Wild boar	2021	174	SAMEA8987178
615	D-14-01023	2014	Cattle	2021	134	SAMEA8987181
619	D-14-01024	2014	Cattle	2021	75	SAMEA8987182
620	D-14-01025	2014	Cattle	2021	112	SAMEA8987183
628	D-14-01726	2014	Badger	2021	113	SAMEA8987187
631	D-14-01726	2014	Badger	2021	96	SAMEA8987188
632	D-14-01726	2014	Badger	2021	140	SAMEA8987189
634	D-14-02055	2014	Cattle	2021	99	SAMEA8987190
637	D-14-02058	2014	Cattle	2021	139	SAMEA8987191
639	D-14-02059	2014	Badger	2021	101	SAMEA8987192
640	D-14-02059	2014	Badger	2021	87	SAMEA8987193
641	D-14-02059	2014	Badger	2021	104	SAMEA8987194
642	D-14-02059	2014	Badger	2021	84	SAMEA8987195
643	D-14-02059	2014	Fox	2021	80	SAMEA8987216
648	D-14-02293	2014	Badger	2021	80	SAMEA8987198
652	D-14-02293	2014	Badger	2021	96	SAMEA8987199
653	D-14-02295	2014	Cattle	2021	113	SAMEA8987200
658	D-14-02553	2014	Badger	2021	94	SAMEA8987204
659	D-14-02553	2014	Badger	2021	88	SAMEA8987205
660	D-14-02553	2014	Badger	2021	98	SAMEA8987206
666	D-14-02973	2014	Badger	2021	134	SAMEA8987208
667	D-14-02973	2014	Badger	2021	88	SAMEA8987209
670	D-14-03388	2014	Cattle	2021	92	SAMEA8987211
671	D-14-03844	2014	Badger	2021	95	SAMEA8987212
674	D-15-00089	2014	Badger	2021	135	SAMEA8987213
